# Supplementary material for: Effects of elevated temperature, reduced hydroperiod, and invasive bullfrog larvae on pacific chorus frog larvae
Source: PubMed Central journal article supplement (PMC8923472; doi:10.1371/journal.pone.0265345), 2022-03-15
Supplement: pone.0265345.s004.pdf [file pone.0265345.s004.pdf]

Table A. Results of logistic regression model of treatment effects on survival.

| Main effect        | Coefficient | SE of coefficient | Z      | p     |
|--------------------|-------------|-------------------|--------|-------|
| Intercept          | 0.1327      | 5.4045            | 0.025  | 0.980 |
| Climate (future)   | -0.3514     | 0.8651            | -0.406 | 0.685 |
| Invasive (present) | -1.4930     | 0.9458            | -1.215 | 0.224 |
| Cage (open)        | 0.3474      | 0.8698            | 0.399  | 0.690 |
| Start size         | -0.5756     | 2.0385            | -0.282 | 0.778 |

Table B. Regression results from gaussian GLM with log link model for mass (g) of Pacific chorus frogs at stage 42

| Effect parameter                                  | Coefficient | SE of coefficient | t-value | p-value |
|---------------------------------------------------|-------------|-------------------|---------|---------|
| Intercept                                         | -2.52443    | 0.73410           | -3.439  | 0.00153 |
| Climate (future)                                  | 0.14103     | 0.21500           | 0.656   | 0.51615 |
| Invasive (present)                                | -0.01817    | 0.25459           | -0.071  | 0.94350 |
| Cage (open)                                       | 0.26961     | 0.20878           | 1.291   | 0.20504 |
| Start size                                        | 0.83741     | 0.26703           | 3.136   | 0.00346 |
| Climate (future): invasive (present)              | -0.14239    | 0.32039           | -0.444  | 0.65946 |
| Climate (future): cage (open)                     | 0.11785     | 0.27330           | 0.431   | 0.66896 |
| Invasive (present): cage (open)                   | -0.26439    | 0.32334           | -0.818  | 0.41906 |
| Climate (future): invasive (present): cage (open) | 0.14432     | 0.40990           | 0.352   | 0.72689 |

Table C. Regression results from quasi-Poisson GLM with log link model for development (days to stage 42) of Pacific chorus frogs

| Effect parameter                                  | Coefficient | SE of coefficient | t-value | p-value   |
|---------------------------------------------------|-------------|-------------------|---------|-----------|
| Intercept                                         | 4.40303     | 0.29133           | 15.113  | < 0.00001 |
| Climate (future)                                  | -0.27304    | 0.08359           | -3.267  | 0.002440  |
| Invasive (present)                                | -0.05409    | 0.07906           | -0.684  | 0.498351  |
| Cage (open)                                       | -0.09466    | 0.07736           | -1.224  | 0.229268  |
| Start size                                        | -0.45042    | 0.11079           | -4.066  | 0.000258  |
| Climate (future): invasive (present)              | 0.09901     | 0.11928           | 0.830   | 0.412120  |
| Climate (future): cage (open)                     | 0.07109     | 0.11900           | 0.597   | 0.554115  |
| Invasive (present): cage (open)                   | 0.06557     | 0.10912           | 0.601   | 0.551771  |
| Climate (future): invasive (present): cage (open) | -0.03748    | 0.16637           | -0.225  | 0.823076  |
